# Supplementary material for: Ammonium and nitrate regulate NH4+ uptake activity of Arabidopsis ammonium transporter AtAMT1;3 via phosphorylation at multiple C-terminal sites
Source: PubMed Central journal article supplement — J Exp Bot. 2019 May 14;70(18):4919–30. doi: 10.1093/jxb/erz230 (PMC6760267; doi:10.1093/jxb/erz230), 2019-05-14
Supplement: erz230_suppl_supplementary_figures_s1-s6_tables_s1-s2.pdf [file erz230_suppl_supplementary_figures_s1-s6_tables_s1-s2.pdf]

**Supplemental Table S1: Primers used in this study.**

| Primer                                               | Sequence (5' to 3')                           | Remark                                |
|------------------------------------------------------|-----------------------------------------------|---------------------------------------|
| qAtUBQ10_F                                           | CTTCGTC AAGACTTTGACCG                         | Q-PCR                                 |
| qAtUBQ10_R                                           | CTTCTTAAGCATAACAGAGACGAG                      |                                       |
| qAtAMT13_F                                           | GAAGGCCATATGGACTATTTATGGG                     | Q-PCR                                 |
| qAtAMT13_R                                           | CGAGGAGGAGTAGCTGATCGAGG                       |                                       |
| qAtEIF4a_F                                           | TCATAGATCTGGTCCTTGAAACC                       | Q-PCR                                 |
| qAtEIF4a_R                                           | GGCAGTCTCTTCGTGCTGAC                          |                                       |
| p426-AtAMT13-EcoR I_F                                | CGGAATTCATGTCAGGAGCAATAACAT                   | AtAMT1;3 cloning                      |
| p426-AtAMT13-EcoR I_R                                | CGGAATTCCTTAAACGCGAGGAGGAGTAG                 |                                       |
| p426-T464A_F                                         | GATGGATATGGCACGTCACGG                         | AtAMT1;3 T464As                       |
| p426-T464A_R                                         | CCTTGCATTTTCATGCTGC                           |                                       |
| p426-S480A_F                                         | TGATGATGAGGCTCATAGAGTG                        | AtAMT1;3 S480As                       |
| p426-S480A_R                                         | TTATCATGGTAGATATAAGCAAAG                      |                                       |
| p426-S480D_F                                         | TGATGATGAGGATCATAGAGTGGATC                    | AtAMT1;3 S480D                        |
| p426-S480D_R                                         | TTATCATGGTAGATATAAGCAAAG                      |                                       |
| p426-S487A_F                                         | GGATCCTGGAGCTCCTTTCCC                         | AtAMT1;3 S487As                       |
| p426-S487A_R                                         | ACTCTATGAGACTCATCATATTATC                     |                                       |
| p426-S487D_F                                         | GGATCCTGGAGATCCTTTCCCTC                       | AtAMT1;3 S487D                        |
| p426-S487D_R                                         | ACTCTATGAGACTCATCATC                          |                                       |
| p426-T494A/T464AT494A_F                              | TCGATCAGCTGCTCCTCCTCG                         | AtAMT1;3 T494A/T464A                  |
| p426-T494A/T464AT494A_R                              | GGGAAAGGAGATCCAGGATC                          | T494A                                 |
| p426-T494D/T464AT494D_F                              | TCGATCAGCTGATCCTCCTCGC                        | AtAMT1;3 T494D/T464A                  |
| p426-T494D/T464AT494D_R                              | GGGAAAGGAGATCCAGGA                            | T494D                                 |
| p426-T464D_F                                         | GATGGATATGGATCGTCACGGTGG                      | AtAMT1;3 T464D/T464D                  |
| p426-T464D_R                                         | CCTTGCATTTTCATGCTGC                           | T494A/T464D T494D                     |
| p426-H474stop_F                                      | TTATATCTACTAAGATAATGATGATGAGTCTC<br>ATAGAGTGG | AtAMT1;3 H474stop                     |
| p426-H474stop_R                                      | GCAAAGCCACCGTGACGT                            |                                       |
| AtAMT1;3pro-Xba I                                    | GCTCTAGAGTTGCAAGAATATTAATAGAAAT<br>AC         | AtAMT1;3 promoter cloning             |
| AtAMT1;3pro-Apa I                                    | GCGGGCCCGTTTGAGAGAGCTGAGAGAGA<br>GAAAGA       |                                       |
| pT-AtAMT1;3pro-AtAMT1;3_F                            | GCGGGCCCATGTCAGGAGCAATAACATGC                 | AtAMT1;3/T464A/T494A/T464A<br>T494A   |
| pT-AtAMT1;3pro-AtAMT1;3/T464A/T494A/T464A<br>T494A_R | GCGGGCCCTTAAACGCGAGGAGGAG                     |                                       |
| pT-AtAMT1;3pro-AtAMT1;3_F                            | GCGGGCCCATGTCAGGAGCAATAACATGC                 | AtAMT1;3 T494D/T464A<br>T494D         |
| pT-AtAMT1;3pro-AtAMT1;3<br>T494D/T464AT494D_R        | GCGGGCCCTTAAACGCGAGGAGGAT                     |                                       |
| poo2-AtAMT1;3_F                                      | GGACTAGTATGTCAGGAGCAATAACATGC                 | AtAMT1;3/T464A/T494A/T464A<br>A/T494D |
| poo2-AtAMT1;3/T494A_R                                | CGGAATTCCTTAAACGCGAGGAGGAG                    |                                       |
| poo2-AtAMT1;3_F                                      | GGACTAGTATGTCAGGAGCAATAACATGC                 | AtAMT1;3 T494D/T464A                  |
| poo2-AtAMT1;3 T494D_R                                | CGGAATTCCTTAAACGCGAGGAGGAT                    | T494D                                 |

**Supplemental Table S2: The phosphorylation sites in AtAMT1s C-terminals.**

| Gene     | Phosphorylation Site               | Treatment                                   | Background              | Tissue                | Detection                     | References                     |                     |
|----------|------------------------------------|---------------------------------------------|-------------------------|-----------------------|-------------------------------|--------------------------------|---------------------|
| AtAMT1;1 | T460                               | flg22                                       | <i>col-0</i>            | suspension cells      | LC-MS/MS (IMAC)               | N ühse et al., 2004            |                     |
|          | T460, S475, S488, S492, T496       | flg22                                       | <i>col-0</i>            | suspension cells      | HPLC-MS/MS ( <sup>15</sup> N) | Benschop et al., 2007          |                     |
|          | S475                               | -                                           | <i>landsberg erecta</i> | suspension cells      | LC-MS/MS (IMAC)               | Sugiyama et al., 2008          |                     |
|          | T460                               | -                                           | <i>columbia</i>         | leaves                | LC-MS/MS (IMAC)               | Whiteman et al., 2008          |                     |
|          | T460                               | -                                           | <i>col-0</i>            | protoplasts/seedlings | LC-MS/MS                      | Jones et al., 2009             |                     |
|          | T460, S475, S488, S490             | -N/ammonium resupply                        | <i>col-0</i>            | roots                 | HPLC-MS/MS ( <sup>15</sup> N) | Lanquar et al., 2009           |                     |
|          | S488, S490, S492, T496, T497, T499 | end of night/end of day                     | <i>col-0</i>            | shoots/rosette leaves | LC-MS/MS (TiO <sub>2</sub> )  | Reiland et al., 2009           |                     |
|          | S490                               | ABA, GA, JA, IAA or cytokinin               | <i>col-0</i>            | suspension cells      | MS/MS (TiO <sub>2</sub> )     | Chen et al., 2010              |                     |
|          | S488                               | ABA                                         | <i>Lehle</i>            | seedlings             | MS/MS ( <sup>15</sup> N)      | Kline et al., 2010             |                     |
|          | T460, S475                         | -                                           | <i>landsberg erecta</i> | suspension cells      | LC-MS/MS (IMAC)               | Nakagami et al., 2010          |                     |
|          | T460, S475, S488, S490, S492, T497 | -N/ammonium resupply or -N/nitrate resupply | <i>col-0</i>            | seedlings             | LC-MS/MS (TiO <sub>2</sub> )  | Engelsberger and Schulze, 2012 |                     |
|          | T460                               | -N/ammonium resupply                        | <i>col-0</i>            | roots                 | pT464 antibody                | Lanquar et al., 2009           |                     |
|          | T460                               | -N/ammonium resupply                        | <i>col-0</i>            | roots                 | GMDMT(p)RAGGFA antibody       | Straub et al., 2017            |                     |
|          | AtAMT1;2                           | T472                                        | -                       | <i>col-0</i>          | protoplasts/seedlings         | LC-MS/MS                       | Jones et al., 2009  |
|          |                                    | T472                                        | -N/ammonium resupply    | <i>col-0</i>          | roots                         | GMDMT(p)RAGGFA antibody        | Straub et al., 2017 |
| AtAMT1;3 | S480, S487, T494                   | -N/ammonium resupply or -N/nitrate resupply | <i>col-0</i>            | seedlings             | LC-MS/MS (TiO <sub>2</sub> )  | Engelsberger and Schulze, 2012 |                     |
|          | T464, S487                         | ammonium or nitrate depletion               | <i>col-0</i>            | roots                 | LC-MS/MS (TiO <sub>2</sub> )  | Menz et al., 2016              |                     |

Note: -, untreated; -N, nitrogen starvation.

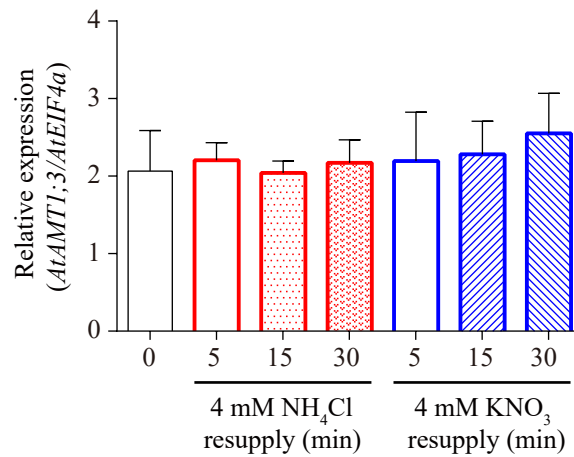

**Supplemental Fig. S1. Transcript expression levels of *AtAMT1;3* in *qko+13* roots in response to ammonium and nitrate resupply.**

Transcript expression levels of *AtAMT1;3* in roots quantified by qPCR with three replicates, and normalized by *AtEIF4a* expression level. Six-weeks-old hydroponically-grown Arabidopsis mutant *qko+13* (*atamt1;1*, *atamt1;2* and *atamt2;1*) were subjected to N starvation for 4 days, and then resupplied with 4 mM  $\text{NH}_4\text{Cl}$  or 4 mM  $\text{KNO}_3$  for 5, 15 and 30 min. Bars indicate means  $\pm$  SD (n=3) and significant differences at  $P < 0.001$  according to Tukey's test are indicated by different letters.

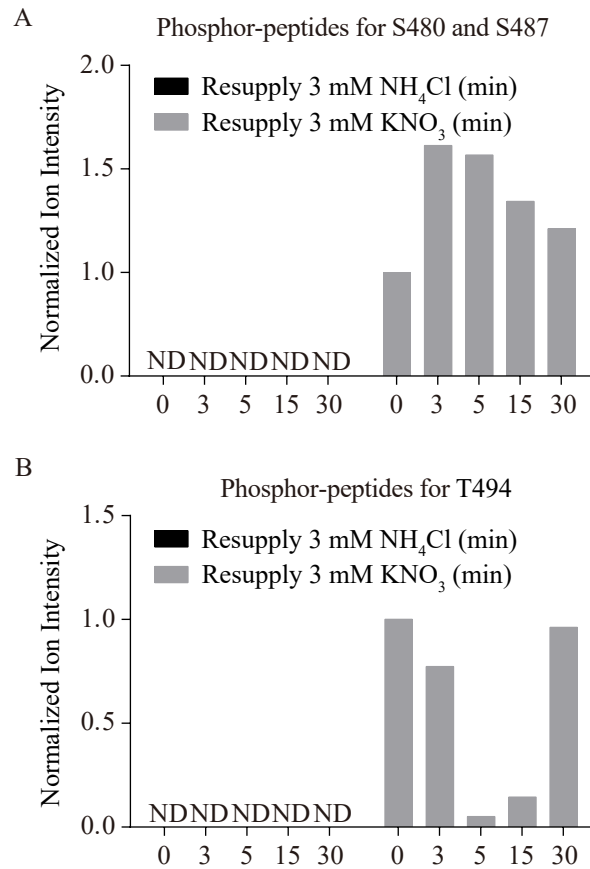

**Supplemental Fig. S2. Phosphorylation dynamics of AtAMT1;3 CTR<sup>NC</sup> at multiple sites (S480, S487, and T494) in response to nitrate or ammonium.**

Normalized ion intensity of (A) phosphorylated AtAMT1;3 peptides HGGFAYIYHDND DES(ph)HRVDPGS(ph)PFPR (S480/S487) and (B) SAT(ph)PPRV (T494) that responded to nitrate or ammonium. The phosphorylated peptides were identified by phosphoproteomics, and the data was obtained from Engelsberger and Schulze (2012). ND, not determined.

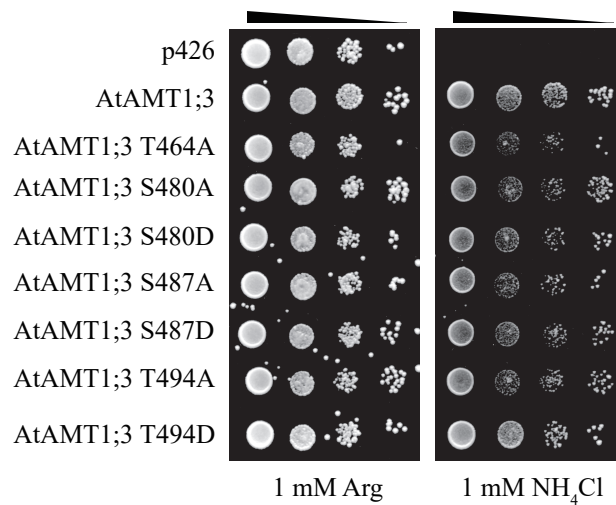

**Supplemental Fig. S3. Yeast growth complementation of AtAMT1;3 S480, S487 and T494 single phosphor-mutants.**

The yeast mutant *31019b* ( $\Delta mep1-3$ ) were transformed with empty vector *p426*, AtAMT1;3 single phosphor-variant T464A, S480A, S480D, S487A, S487D, T494A or T494D. Transformants were selected on YNB medium supplemented with 1 mM arginine (Arg). Five microliters of yeast cell suspensions from overnight cultures were spotted in 1- to 4-fold dilution on YNB medium supplemented with either 1 mM Arg or 1 mM ammonium as the sole N source at pH 5.5 for 3 days at 28 °C.

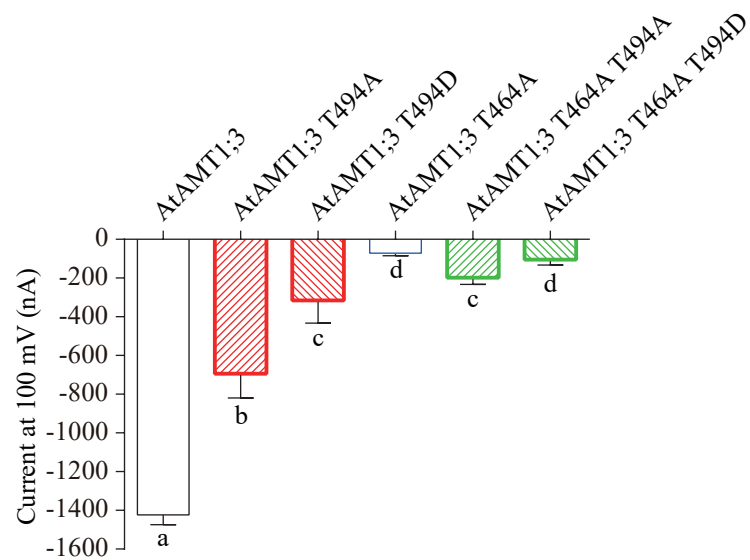

**Supplemental Fig. S4. Functional characterization of AtAMT1;3 T494 single phosphor-mutants and T464 T494 double phosphor-mutants in *Xenopus* oocytes.**

Ammonium induced currents in oocytes injected with AtAMT1;3, and AtAMT1;3 single phosphor-mutants T494A, T494D or T464A, and double phosphor-mutants T464A T494D or T464A T494D. Net currents were measured conditions of 1000  $\mu$ M  $\text{NH}_4\text{Cl}$  at -100 mV. Bars indicate means  $\pm$  SD ( $n \geq 4$ ) and significant differences at  $P < 0.05$  according to Tukey's test are indicated by different letters.

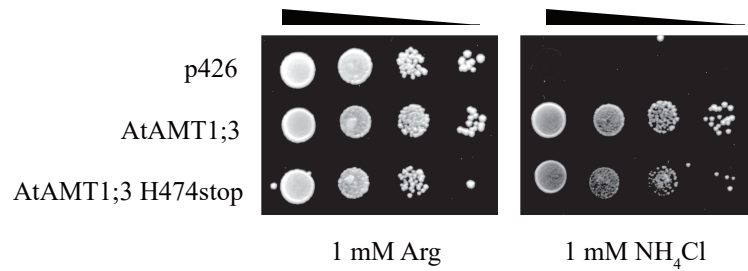

**Supplemental Fig. S5. Yeast growth complementation of AtAMT1;3 CTR<sup>NC</sup> deletion mutant.**

The yeast mutant *31019b* ( $\Delta$ *mep1-3*) were transformed with empty vector *p426*, AtAMT1;3 wild type or the CTR<sup>NC</sup> deletion mutant AtAMT1;3 H474stop. Transformants were selected on YNB medium supplemented with 1 mM arginine (Arg). Five microliters of yeast cell suspensions from overnight cultures were spotted in 1- to 4-fold dilution on YNB medium supplemented with either 1 mM Arg or 1 mM ammonium as the sole N source at pH 5.5 for 3 days at 28°C.

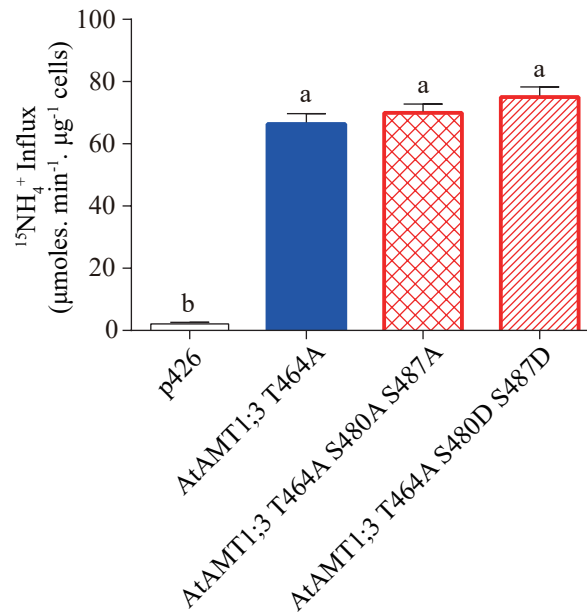

**Supplemental Fig. S6. Functional characterization of AtAMT1;3 T464 S480 S487 triple phosphor-mutants in yeasts.**

Influx of  $^{15}\text{N}$ -labelled ammonium into yeast mutant *31019b* expressing empty vector *p426*, AtAMT1;3 single phosphor-variant T464A and triple phosphor-variants T464A S480A S487A or T464A S480D S487D. The yeast cells were grown on YNB medium supplemented with 3% glucose and 1 mM Arg to OD600 of 0.8. Cells were harvested and suspended in 100 mM potassium phosphate buffer (pH 5.8) to a final OD600 of 40 for  $^{15}\text{N}$ -labelled ammonium influx assay. Influx assays were performed at the concentration of 250  $\mu\text{M}$  of  $^{15}\text{NH}_4^+$  for 6 min. Bars indicate means  $\pm$  SD (n=5) and significant differences at  $P < 0.001$  according to Tukey's test are indicated by different letters.
